# Supplementary material for: Cyclopentadienyl iron dicarbonyl (CpFe(CO)2) derivatives as apoptosis-inducing agents
Source: Royal Society of Chemistry journal article supplement (doi:10.1039/c5ra23891a), 2016-01-01
Supplement: c5ra23891a1.pdf [file c5ra23891a1.pdf]

## Electronic Supplementary Information (ESI)

### Cyclopentadienyl iron dicarbonyl (CpFe(CO)<sub>2</sub>) derivatives as apoptosis-inducing agents

*H.T. Poh<sup>a</sup>, P.C. Ho<sup>b</sup>, and Wai Yip Fan<sup>a,\*</sup>*

<sup>a</sup>Department of Chemistry, National University of Singapore, 3 Science Drive 3, Singapore  
117543

<sup>b</sup>Division of Pharmacy, National University of Singapore, 18 Science Drive 4, Singapore  
117543.

\*Corresponding author: Fax : (+65) 67791691. E-mail: [chmfanwy@nus.edu.sg](mailto:chmfanwy@nus.edu.sg)

#### Table of contents:

1. IC<sub>50</sub> Curves for MDA-MB-231 Cell Line
2. IC<sub>50</sub> Curves for HeLa Cell Line
3. Flow Cytometry Dot Plots (MDA-MB-231)
4. Flow Cytometry Dot Plots (HeLa)
5. Flow Cytometry Dot Plots (MCF-10A)
6. Confocal Images for MDA-MB-231 Cell Line
7. X-ray structural reports for CpFe(CO)<sub>2</sub>(SCN), **4** and CpFe(CO)<sub>2</sub>(NCS), **5**

# 1. IC<sub>50</sub> Curve for MDA-MB-231 Cell Line

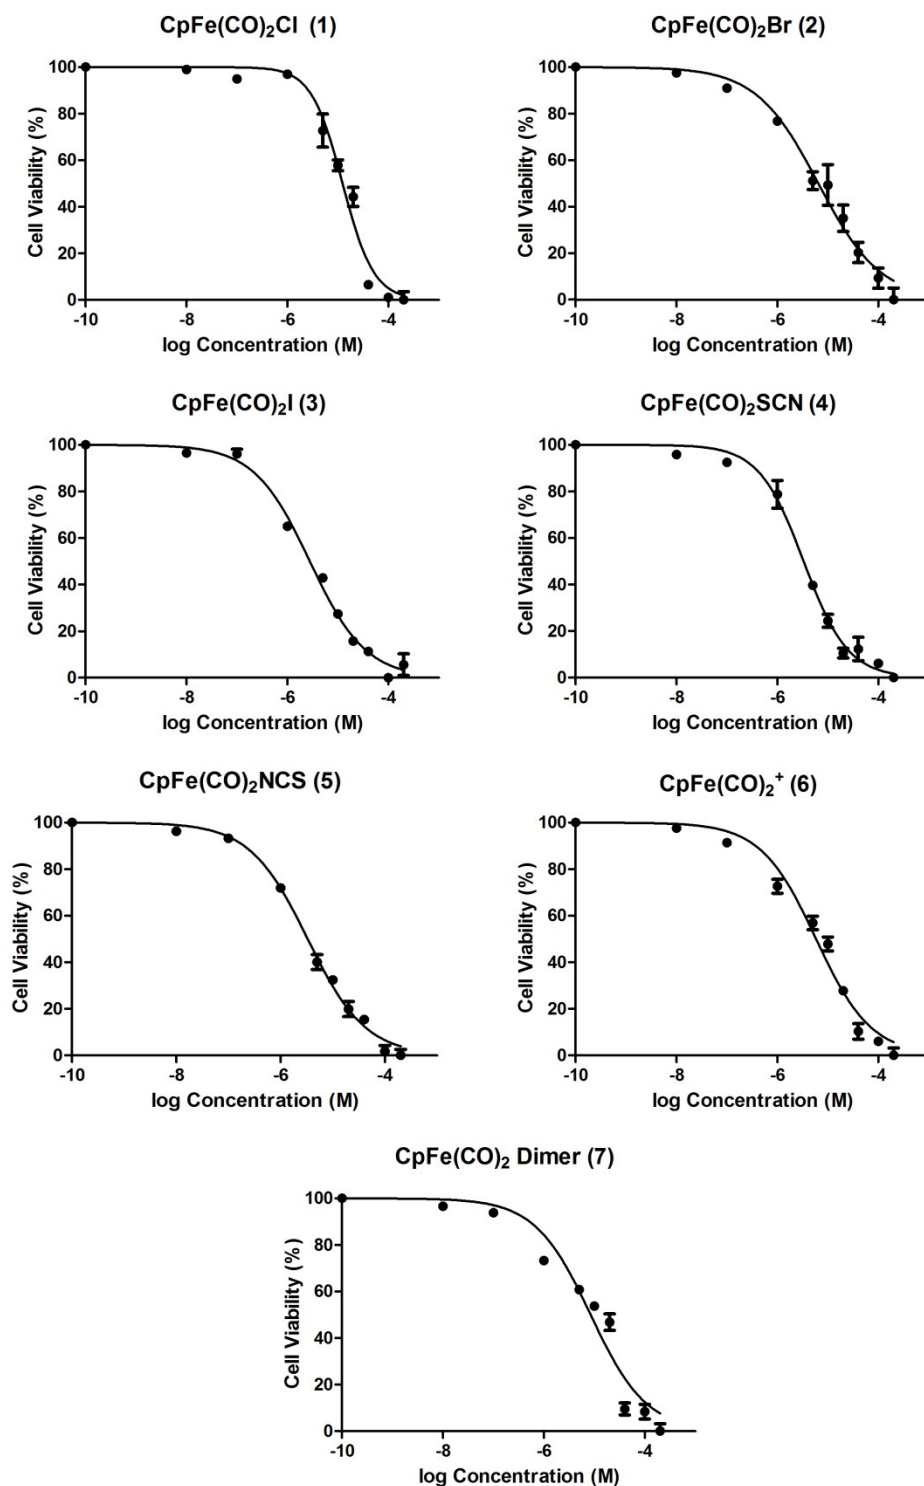

IC<sub>50</sub> curves for CpFe(CO)<sub>2</sub> complexes 1 to 7. MTS measurements were made on the MDA-MB-231 cell line after 24 hour treatment with the respective complexes at 37°C.

## 2. IC<sub>50</sub> Curve for HeLa Cell Line

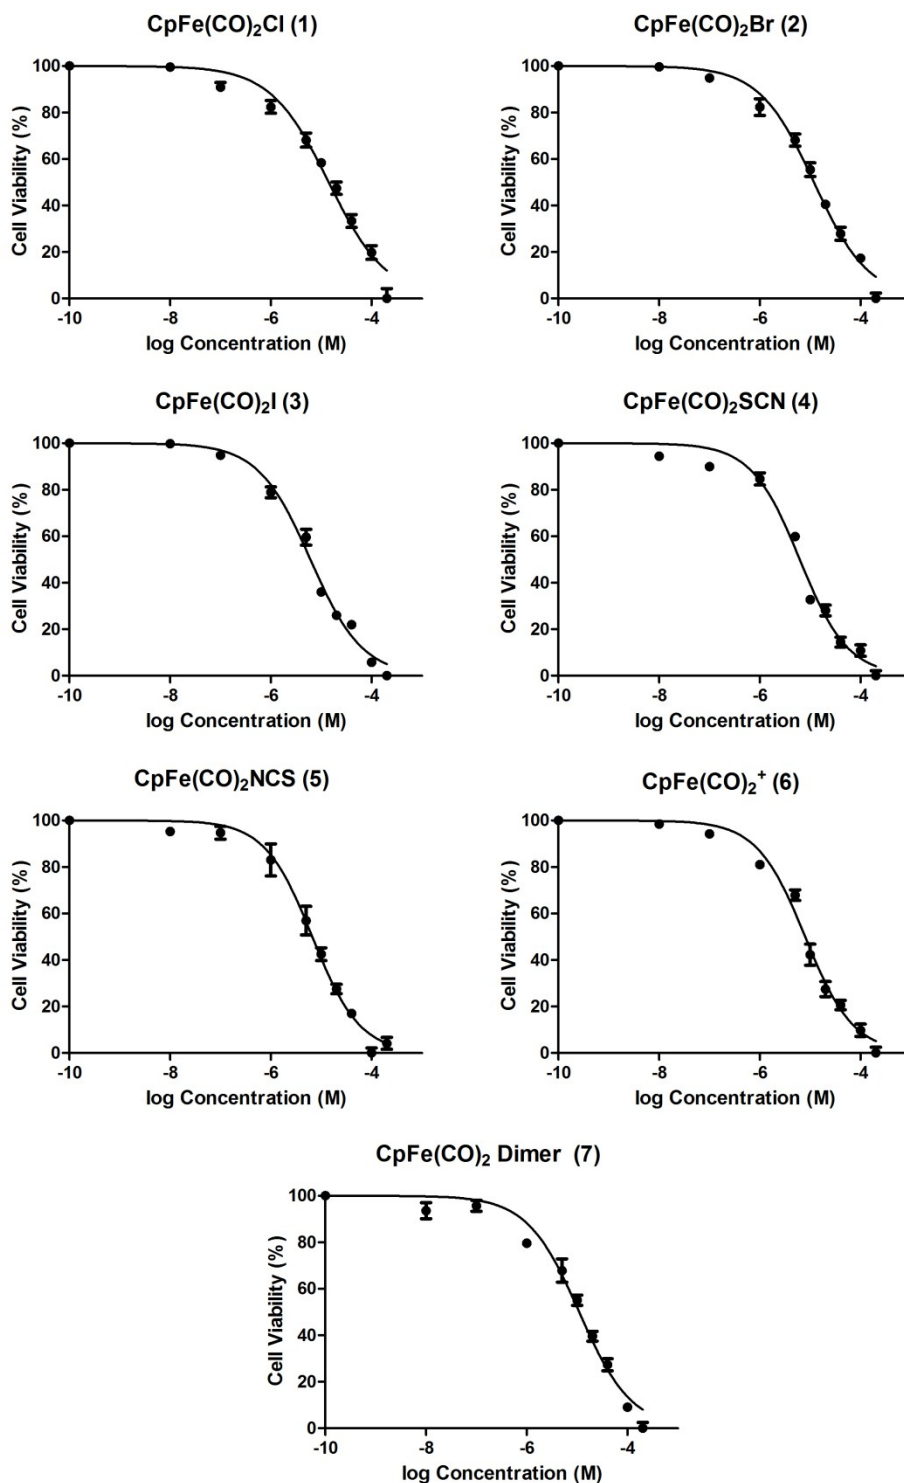

IC<sub>50</sub> curves for CpFe(CO)<sub>2</sub> complexes 1 to 7. MTS measurements were made on the HeLa cell line after 24 hour treatment with the respective complexes at 37°C.

### 3. Flow Cytometry Dot Plots (MDA-MB-231)

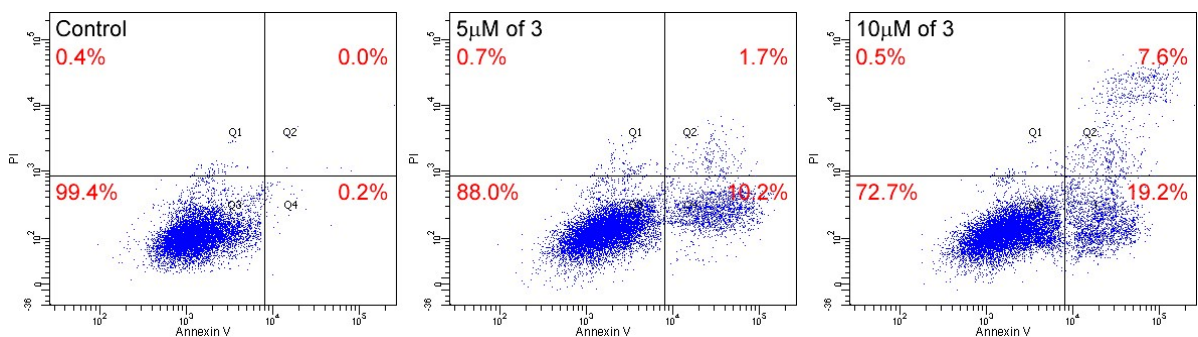

Detection of early and late apoptotic MDA-MB-231 cells after staining with Annexin V-Alexa Fluor 488 and PI. Cells were incubated for 24 h with 0 μM (control), 5 μM and 10 μM solutions of complex **3** before staining.

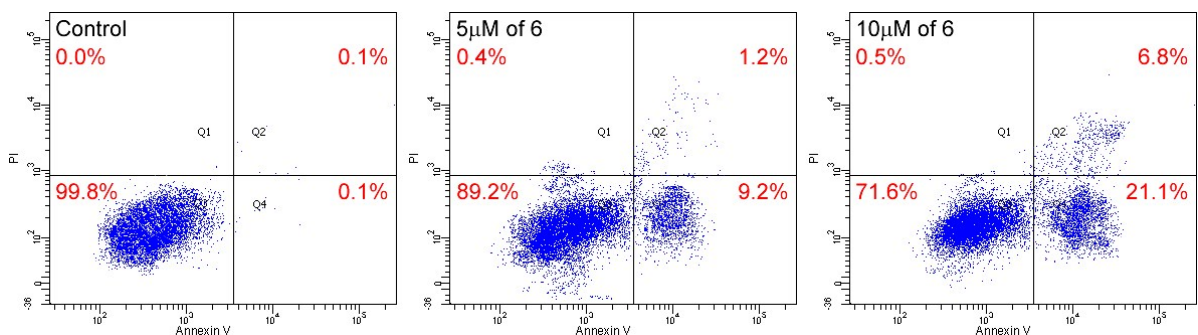

Detection of early and late apoptotic MDA-MB-231 cells after staining with Annexin V-Alexa Fluor 488 and PI. Cells were incubated for 24 h with 0 μM (control), 5 μM and 10 μM solutions of complex **6** before staining.

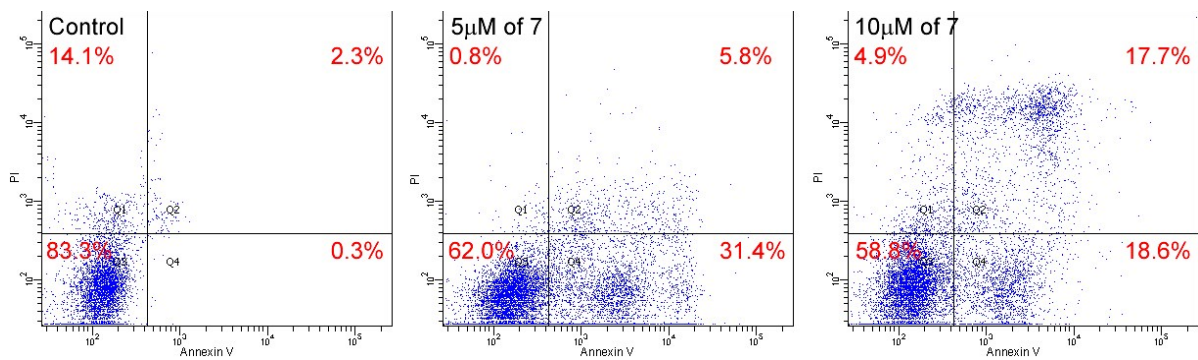

Detection of early and late apoptotic MDA-MB-231 cells after staining with Annexin V-Alexa Fluor 488 and PI. Cells were incubated for 24 h with 0 µM (control), 5 µM and 10 µM solutions of complex 7 before staining.

#### 4. Flow Cytometry Dot Plots (HeLa)

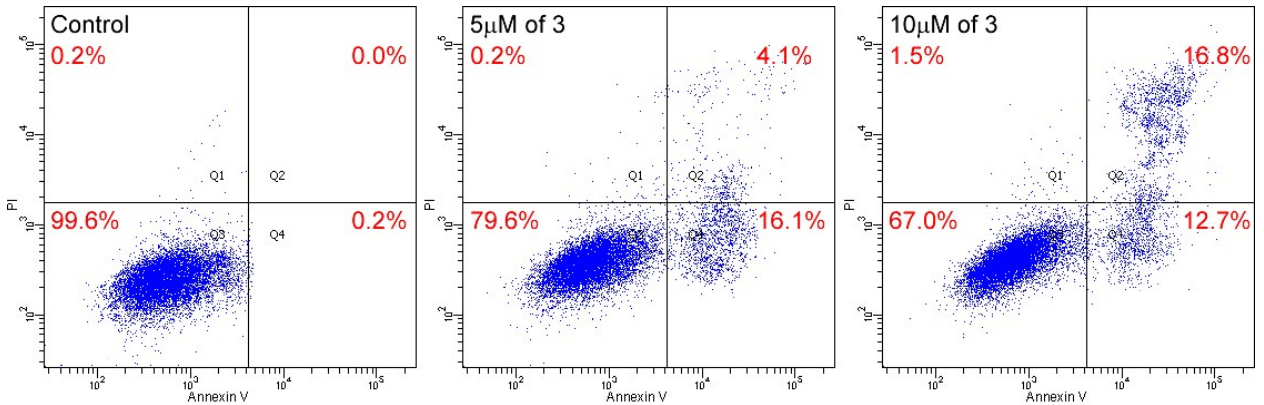

Detection of early and late apoptotic HeLa cells after staining with Annexin V-Alexa Fluor 488 and PI. Cells were incubated for 24 h with 0 μM (control), 5 μM and 10 μM solutions of complex 3 before staining.

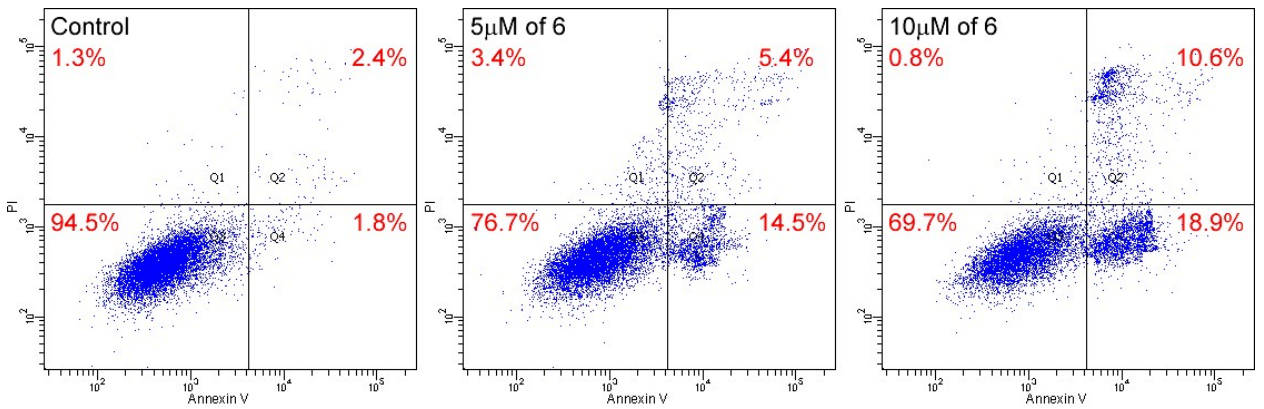

Detection of early and late apoptotic HeLa cells after staining with Annexin V-Alexa Fluor 488 and PI. Cells were incubated for 24 h with 0 μM (control), 5 μM and 10 μM solutions of complex 6 before staining.

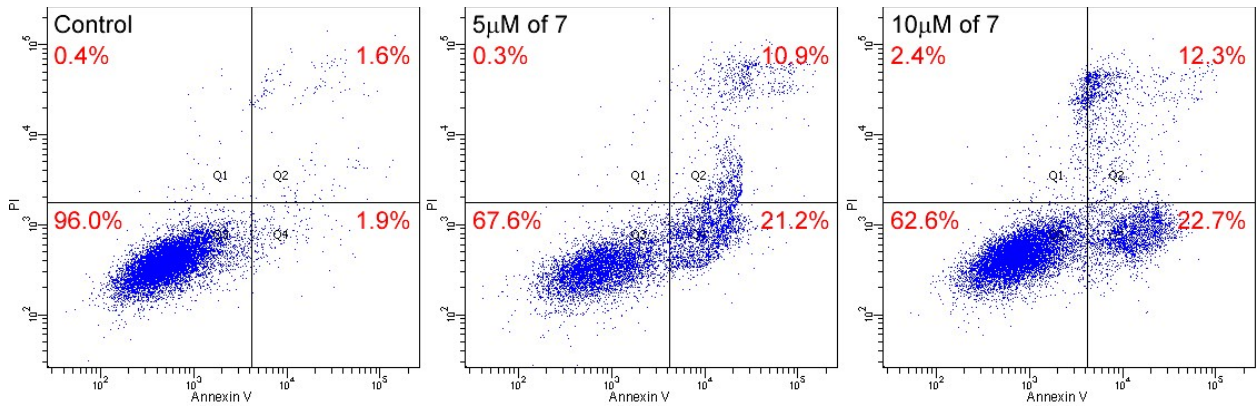

Detection of early and late apoptotic HeLa cells after staining with Annexin V-Alexa Fluor 488 and PI. Cells were incubated for 24 h with 0 μM (control), 5 μM and 10 μM solutions of complex 7 before staining.



## 5. Flow Cytometry Dot Plots (MCF-10A)

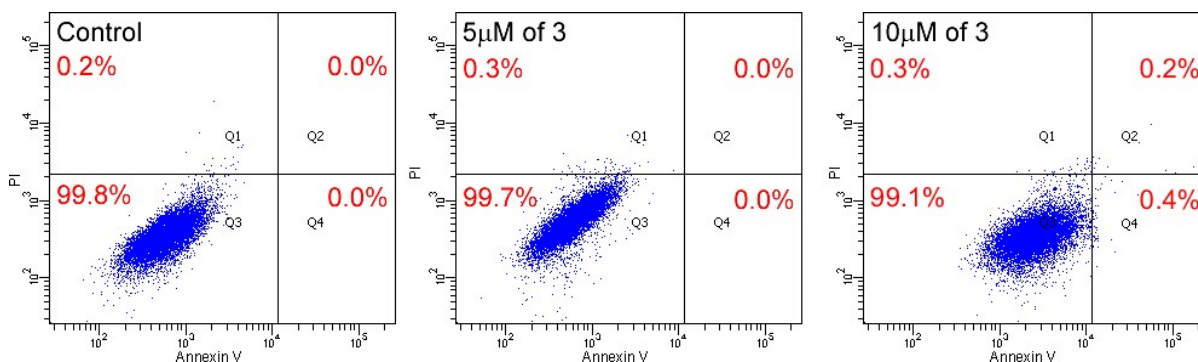

Detection of early and late apoptotic MCF-10A normal mammary cells after staining with Annexin V-Alexa Fluor 488 and PI. Cells were incubated for 24 h with 0 μM (control), 5 μM and 10 μM solutions of complex **3** before staining.

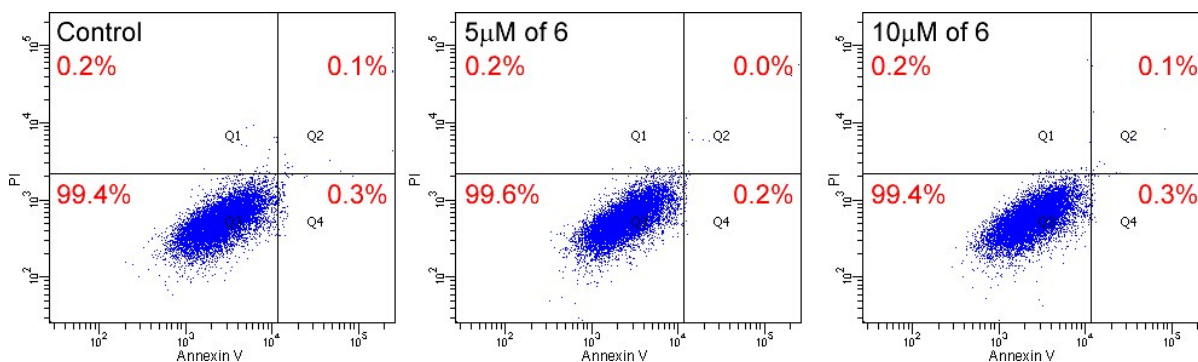

Detection of early and late apoptotic MCF-10A normal mammary cells after staining with Annexin V-Alexa Fluor 488 and PI. Cells were incubated for 24 h with 0 μM (control), 5 μM and 10 μM solutions of complex **6** before staining.



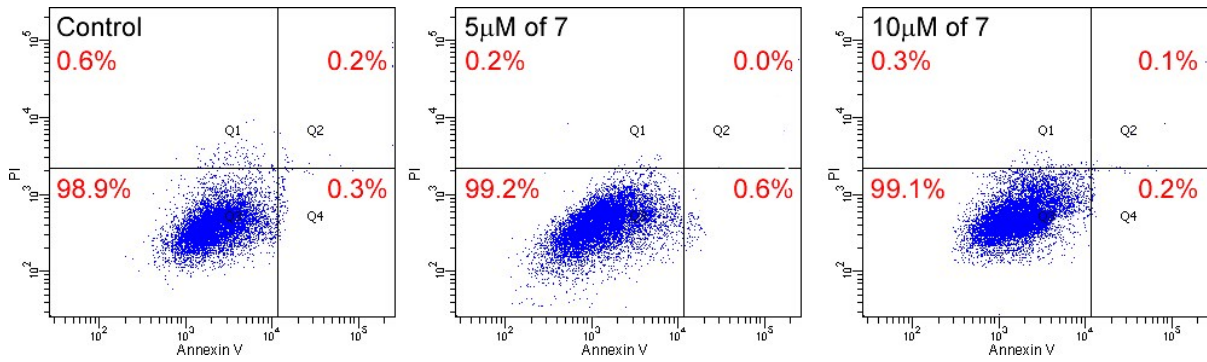

Detection of early and late apoptotic MCF-10A normal mammary cells after staining with Annexin V-Alexa Fluor 488 and PI. Cells were incubated for 24 h with 0 µM (control), 5 µM and 10 µM solutions of complex 7 before staining.

## 6. Confocal Images for MDA-MB-231 Cell Line

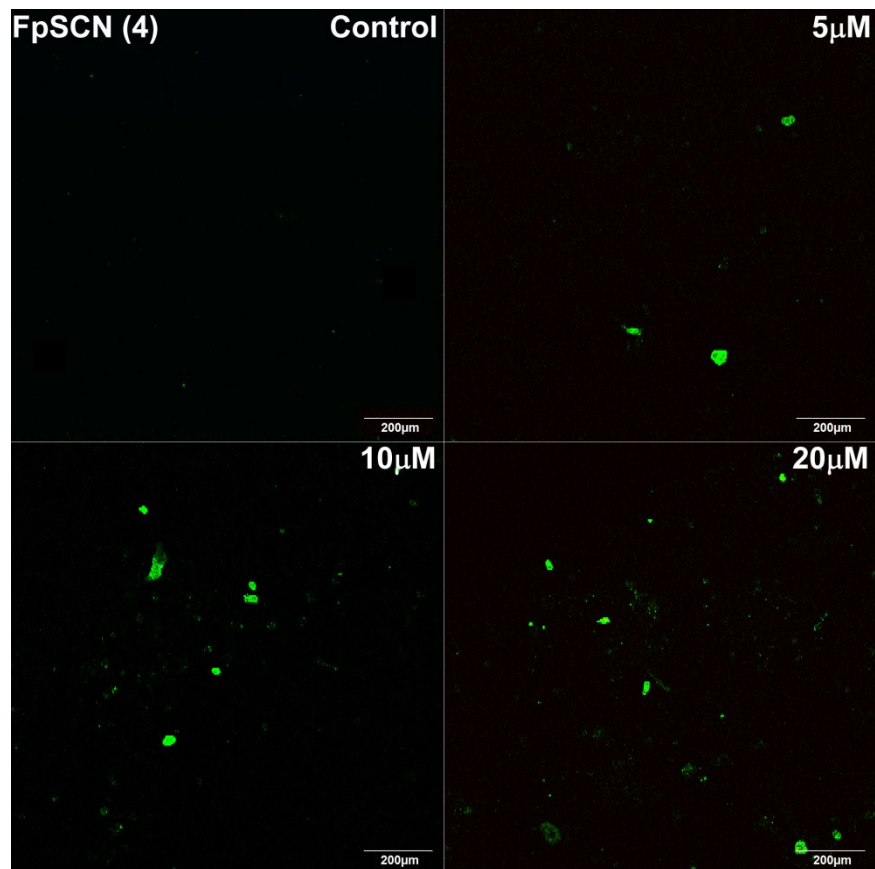

Annexin V (green) and PI (red) stained MDA-MB-231 cells after treatment with 0  $\mu\text{M}$  (control), 5  $\mu\text{M}$ , 10  $\mu\text{M}$  and 20  $\mu\text{M}$  of complex 4 at 37  $^{\circ}\text{C}$  for 24 hours.

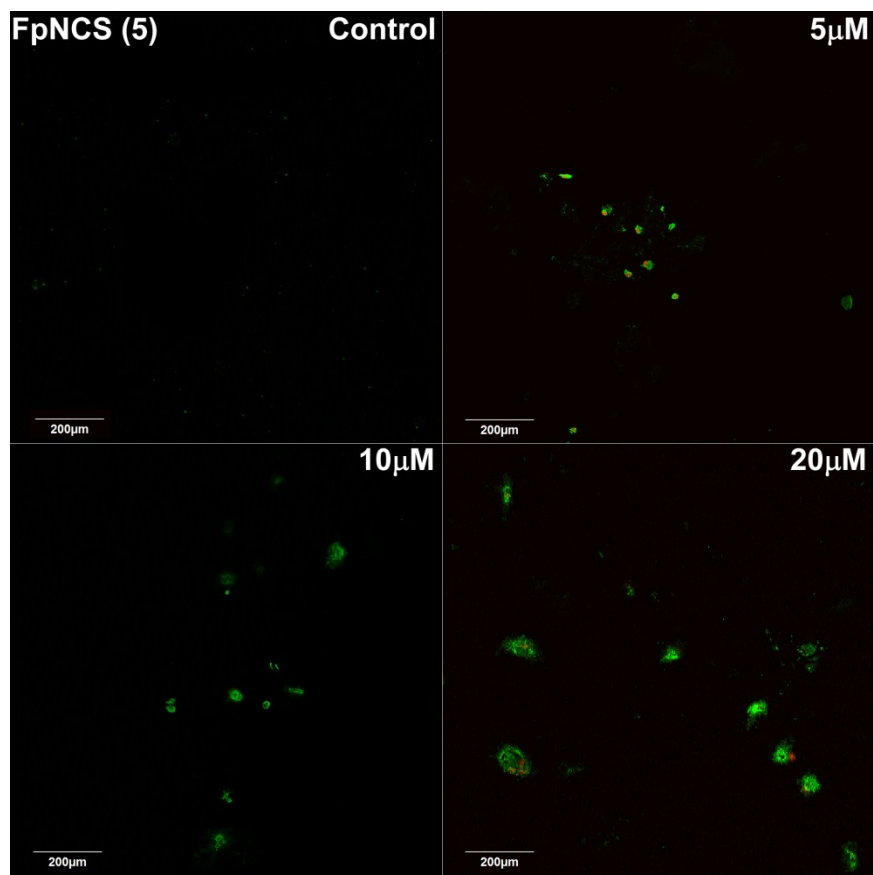

Annexin V (green) and PI (red) stained MDA-MB-231 cells after treatment with 0  $\mu\text{M}$  (control), 5  $\mu\text{M}$ , 10  $\mu\text{M}$  and 20  $\mu\text{M}$  of complex **5** at 37  $^{\circ}\text{C}$  for 24 hours.

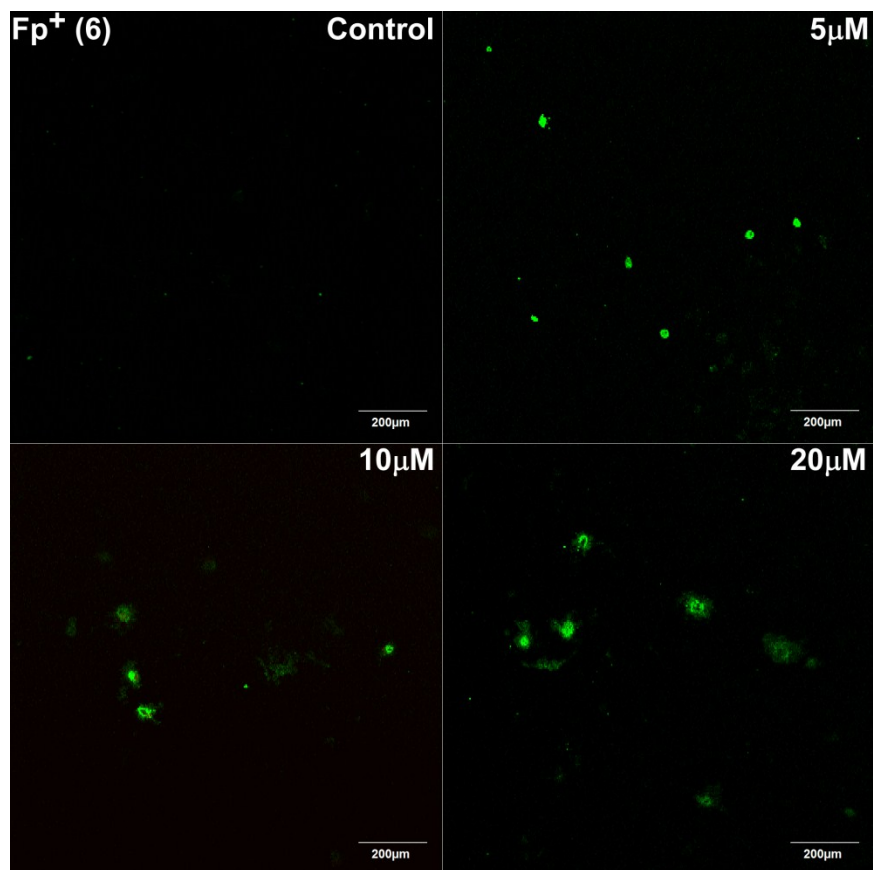

Annexin V (green) and PI (red) stained MDA-MB-231 cells after treatment with 0  $\mu\text{M}$  (control), 5  $\mu\text{M}$ , 10  $\mu\text{M}$  and 20  $\mu\text{M}$  of complex **6** at 37 °C for 24 hours.

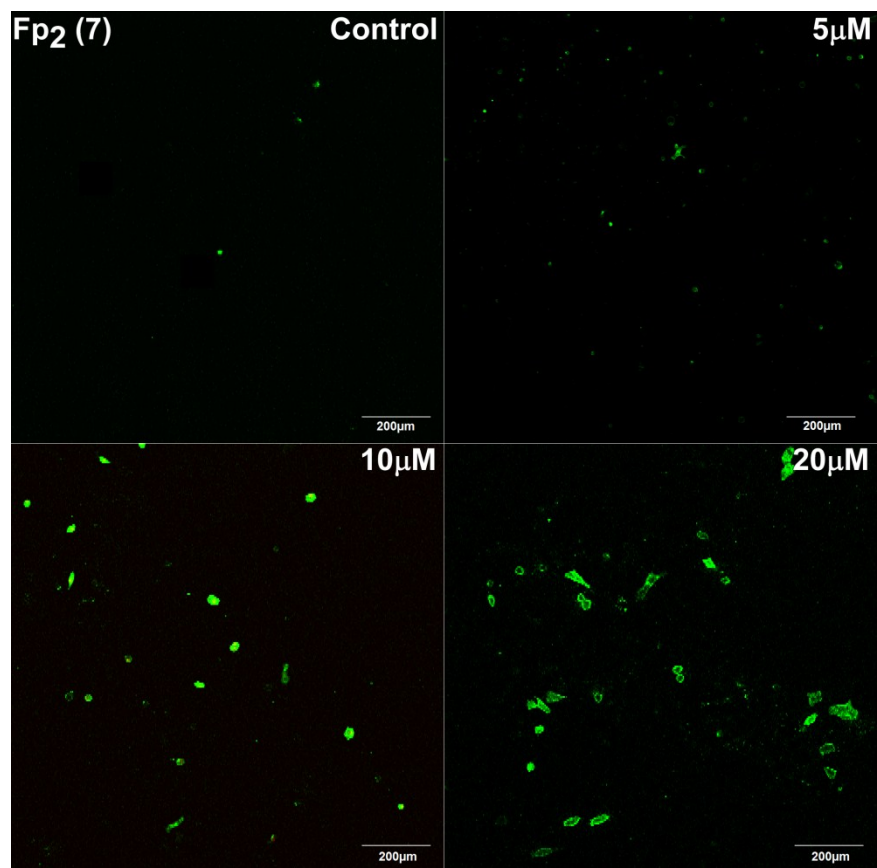

Annexin V (green) and PI (red) stained MDA-MB-231 cells after treatment with 0  $\mu\text{M}$  (control), 5  $\mu\text{M}$ , 10  $\mu\text{M}$  and 20  $\mu\text{M}$  of complex 7 at 37  $^{\circ}\text{C}$  for 24 hours.

## 7. Confocal Images for HeLa Cell Line

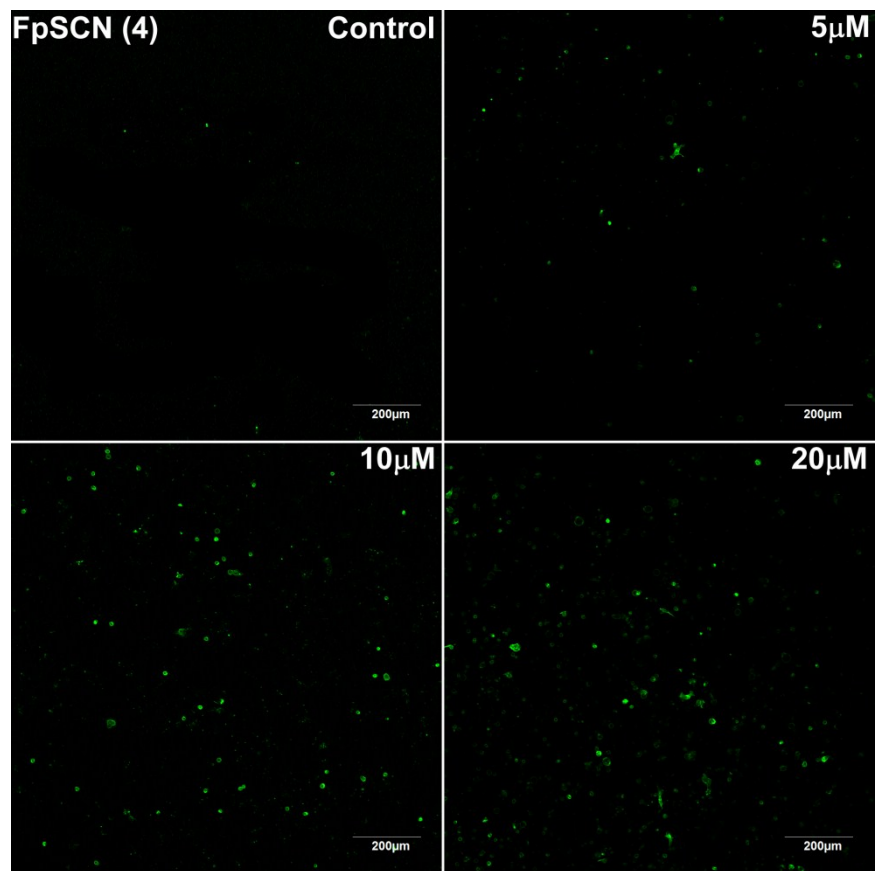

Annexin V (green) and PI (red) stained HeLa cells after treatment with 0 µM (control), 5 µM, 10 µM and 20 µM of complex 4 at 37 °C for 24 hours.

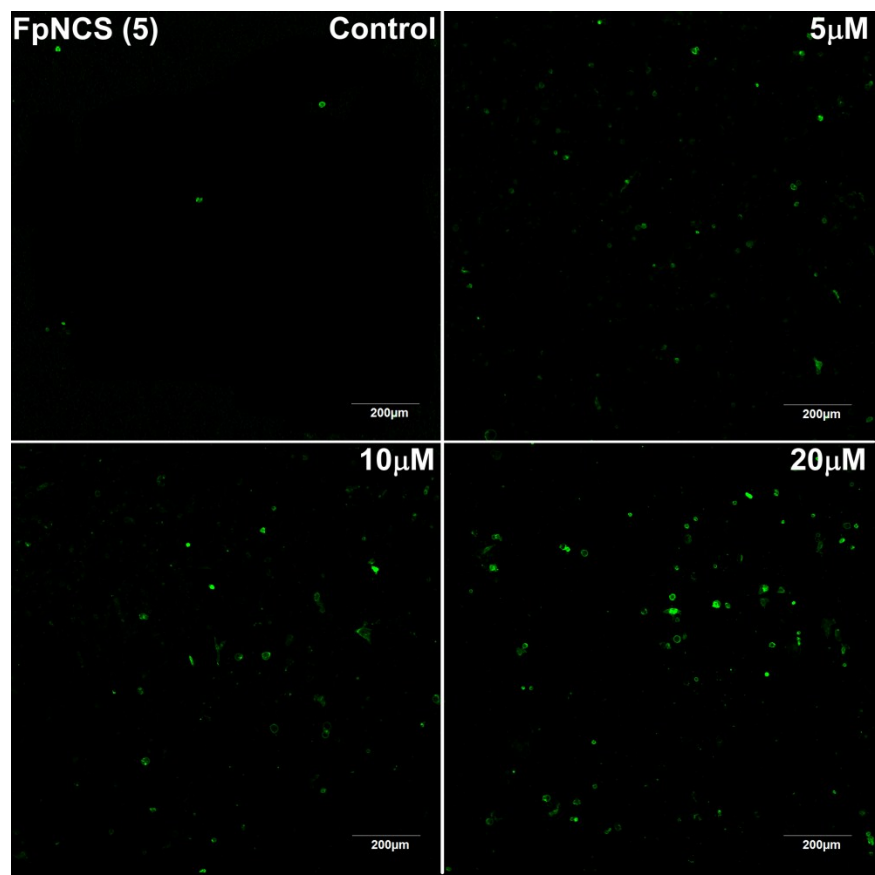

Annexin V (green) and PI (red) stained HeLa cells after treatment with 0  $\mu\text{M}$  (control), 5  $\mu\text{M}$ , 10  $\mu\text{M}$  and 20  $\mu\text{M}$  of complex **5** at 37  $^{\circ}\text{C}$  for 24 hours.



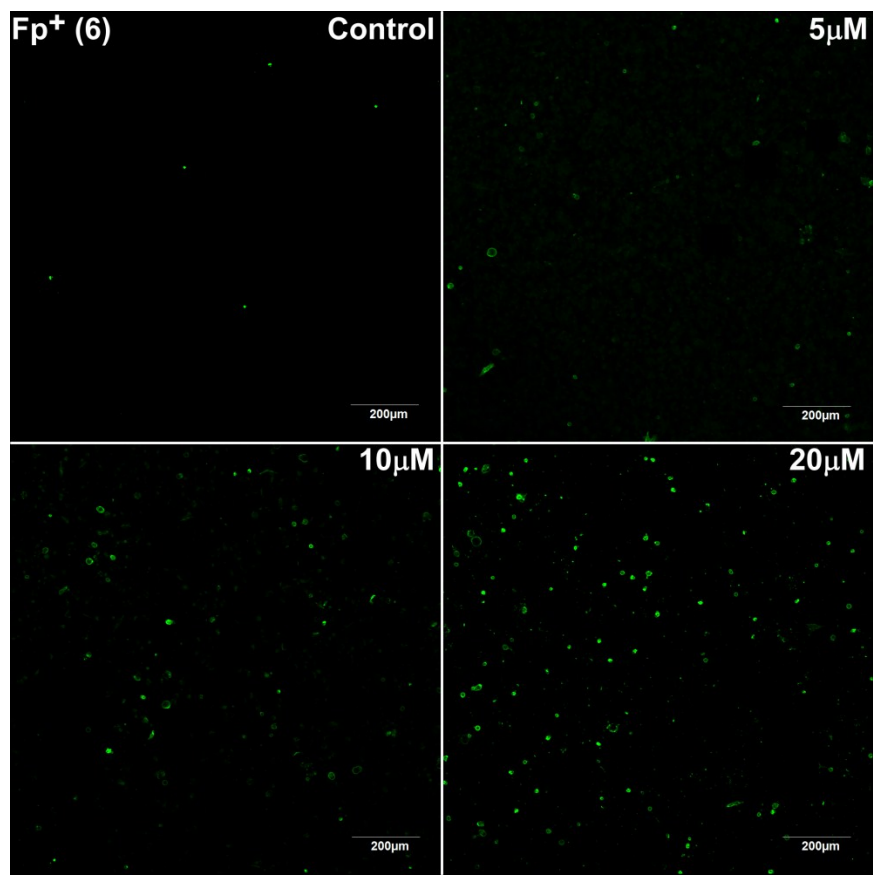

Annexin V (green) and PI (red) stained HeLa cells after treatment with 0 μM (control), 5 μM, 10 μM and 20 μM of complex **6** at 37 °C for 24 hours.

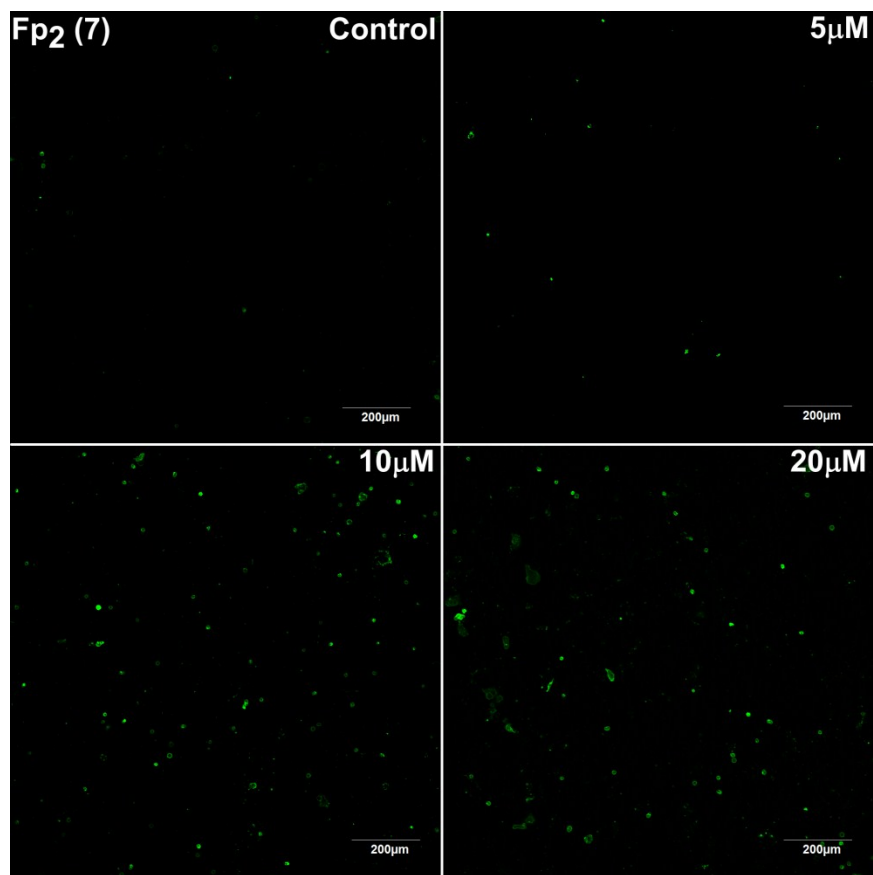

Annexin V (green) and PI (red) stained HeLa cells after treatment with 0  $\mu\text{M}$  (control), 5  $\mu\text{M}$ , 10  $\mu\text{M}$  and 20  $\mu\text{M}$  of complex 7 at 37  $^{\circ}\text{C}$  for 24 hours.

## 8. X-ray structural reports for CpFe(CO)<sub>2</sub>(SCN), 4 and CpFe(CO)<sub>2</sub>(NCS), 5

### CpFe(CO)<sub>2</sub>(SCN), 4

Table 1. Crystal data and structure refinement for C790.

|                                   |                                                     |                  |
|-----------------------------------|-----------------------------------------------------|------------------|
| Identification code               | c790                                                |                  |
| Empirical formula                 | C <sub>8</sub> H <sub>5</sub> Fe N O <sub>2</sub> S |                  |
| Formula weight                    | 235.04                                              |                  |
| Temperature                       | 100(2) K                                            |                  |
| Wavelength                        | 0.71073 Å                                           |                  |
| Crystal system                    | Triclinic                                           |                  |
| Space group                       | P-1                                                 |                  |
| Unit cell dimensions              | a = 6.798(4) Å                                      | a = 93.169(7)°.  |
|                                   | b = 7.024(4) Å                                      | b = 95.036(7)°.  |
|                                   | c = 10.813(6) Å                                     | g = 118.514(7)°. |
| Volume                            | 449.1(4) Å <sup>3</sup>                             |                  |
| Z                                 | 2                                                   |                  |
| Density (calculated)              | 1.738 Mg/m <sup>3</sup>                             |                  |
| Absorption coefficient            | 1.871 mm <sup>-1</sup>                              |                  |
| F(000)                            | 236                                                 |                  |
| Crystal size                      | 0.40 x 0.26 x 0.10 mm <sup>3</sup>                  |                  |
| Theta range for data collection   | 1.90 to 27.50°.                                     |                  |
| Index ranges                      | -8<=h<=8, -9<=k<=9, -14<=l<=14                      |                  |
| Reflections collected             | 4151                                                |                  |
| Independent reflections           | 2052 [R(int) = 0.0515]                              |                  |
| Completeness to theta = 27.50°    | 99.3 %                                              |                  |
| Absorption correction             | Semi-empirical from equivalents                     |                  |
| Max. and min. transmission        | 0.7457 and 0.5570                                   |                  |
| Refinement method                 | Full-matrix least-squares on F <sup>2</sup>         |                  |
| Data / restraints / parameters    | 2052 / 0 / 118                                      |                  |
| Goodness-of-fit on F <sup>2</sup> | 1.065                                               |                  |
| Final R indices [I>2sigma(I)]     | R1 = 0.0533, wR2 = 0.1200                           |                  |
| R indices (all data)              | R1 = 0.0738, wR2 = 0.1469                           |                  |
| Largest diff. peak and hole       | 0.932 and -0.803 e.Å <sup>-3</sup>                  |                  |

Table 2. Atomic coordinates ( $\times 10^4$ ) and equivalent isotropic displacement parameters ( $\text{\AA}^2 \times 10^3$ ) for C790.  $U(\text{eq})$  is defined as one third of the trace of the orthogonalized  $U_{ij}$  tensor.

|       | x       | y        | z       | $U(\text{eq})$ |
|-------|---------|----------|---------|----------------|
| Fe(1) | 5305(1) | 2275(1)  | 2345(1) | 10(1)          |
| S(1)  | 3906(2) | -1262(2) | 1484(1) | 17(1)          |
| O(1)  | 1895(6) | 898(6)   | 4058(3) | 23(1)          |
| O(2)  | 2515(7) | 3033(7)  | 435(4)  | 28(1)          |
| N(1)  | 3899(8) | -3427(8) | 3640(4) | 23(1)          |
| C(1)  | 7645(8) | 4815(8)  | 3658(5) | 16(1)          |
| C(2)  | 7870(9) | 5491(9)  | 2433(5) | 21(1)          |
| C(3)  | 8446(8) | 4115(9)  | 1697(5) | 17(1)          |
| C(4)  | 8586(9) | 2631(9)  | 2479(5) | 20(1)          |
| C(5)  | 8068(8) | 3019(8)  | 3681(5) | 17(1)          |
| C(6)  | 3916(8) | -2506(8) | 2776(5) | 15(1)          |
| C(7)  | 3219(8) | 1435(8)  | 3394(4) | 13(1)          |
| C(8)  | 3615(9) | 2715(8)  | 1168(5) | 17(1)          |

Table 3. Bond lengths [ $\text{\AA}$ ] and angles [ $^\circ$ ] for C790.

|                 |            |
|-----------------|------------|
| Fe(1)-C(8)      | 1.778(5)   |
| Fe(1)-C(7)      | 1.789(5)   |
| Fe(1)-C(2)      | 2.083(5)   |
| Fe(1)-C(1)      | 2.084(5)   |
| Fe(1)-C(5)      | 2.096(5)   |
| Fe(1)-C(3)      | 2.109(5)   |
| Fe(1)-C(4)      | 2.114(5)   |
| Fe(1)-S(1)      | 2.2970(18) |
| S(1)-C(6)       | 1.690(5)   |
| O(1)-C(7)       | 1.135(6)   |
| O(2)-C(8)       | 1.146(6)   |
| N(1)-C(6)       | 1.163(7)   |
| C(1)-C(5)       | 1.422(7)   |
| C(1)-C(2)       | 1.428(7)   |
| C(1)-H(1)       | 1.0000     |
| C(2)-C(3)       | 1.432(8)   |
| C(2)-H(2)       | 1.0000     |
| C(3)-C(4)       | 1.410(7)   |
| C(3)-H(3)       | 1.0000     |
| C(4)-C(5)       | 1.422(7)   |
| C(4)-H(4)       | 1.0000     |
| C(5)-H(5)       | 1.0000     |
| C(8)-Fe(1)-C(7) | 93.9(2)    |
| C(8)-Fe(1)-C(2) | 91.3(2)    |
| C(7)-Fe(1)-C(2) | 122.0(2)   |
| C(8)-Fe(1)-C(1) | 121.2(2)   |
| C(7)-Fe(1)-C(1) | 91.4(2)    |
| C(2)-Fe(1)-C(1) | 40.1(2)    |
| C(8)-Fe(1)-C(5) | 158.1(2)   |
| C(7)-Fe(1)-C(5) | 96.8(2)    |
| C(2)-Fe(1)-C(5) | 66.9(2)    |
| C(1)-Fe(1)-C(5) | 39.8(2)    |
| C(8)-Fe(1)-C(3) | 97.6(2)    |

|                 |            |
|-----------------|------------|
| C(7)-Fe(1)-C(3) | 158.5(2)   |
| C(2)-Fe(1)-C(3) | 40.0(2)    |
| C(1)-Fe(1)-C(3) | 67.1(2)    |
| C(5)-Fe(1)-C(3) | 66.8(2)    |
| C(8)-Fe(1)-C(4) | 133.4(2)   |
| C(7)-Fe(1)-C(4) | 132.7(2)   |
| C(2)-Fe(1)-C(4) | 65.9(2)    |
| C(1)-Fe(1)-C(4) | 66.2(2)    |
| C(5)-Fe(1)-C(4) | 39.5(2)    |
| C(3)-Fe(1)-C(4) | 39.0(2)    |
| C(8)-Fe(1)-S(1) | 90.99(17)  |
| C(7)-Fe(1)-S(1) | 91.22(16)  |
| C(2)-Fe(1)-S(1) | 146.40(17) |
| C(1)-Fe(1)-S(1) | 147.46(15) |
| C(5)-Fe(1)-S(1) | 107.74(15) |
| C(3)-Fe(1)-S(1) | 106.59(15) |
| C(4)-Fe(1)-S(1) | 88.71(15)  |
| C(6)-S(1)-Fe(1) | 100.96(17) |
| C(5)-C(1)-C(2)  | 107.8(4)   |
| C(5)-C(1)-Fe(1) | 70.5(3)    |
| C(2)-C(1)-Fe(1) | 69.9(3)    |
| C(5)-C(1)-H(1)  | 126.1      |
| C(2)-C(1)-H(1)  | 126.1      |
| Fe(1)-C(1)-H(1) | 126.1      |
| C(1)-C(2)-C(3)  | 108.3(5)   |
| C(1)-C(2)-Fe(1) | 70.0(3)    |
| C(3)-C(2)-Fe(1) | 71.0(3)    |
| C(1)-C(2)-H(2)  | 125.8      |
| C(3)-C(2)-H(2)  | 125.8      |
| Fe(1)-C(2)-H(2) | 125.8      |
| C(4)-C(3)-C(2)  | 106.9(5)   |
| C(4)-C(3)-Fe(1) | 70.7(3)    |
| C(2)-C(3)-Fe(1) | 69.0(3)    |
| C(4)-C(3)-H(3)  | 126.5      |
| C(2)-C(3)-H(3)  | 126.5      |
| Fe(1)-C(3)-H(3) | 126.5      |

|                 |          |
|-----------------|----------|
| C(3)-C(4)-C(5)  | 109.5(5) |
| C(3)-C(4)-Fe(1) | 70.3(3)  |
| C(5)-C(4)-Fe(1) | 69.6(3)  |
| C(3)-C(4)-H(4)  | 125.2    |
| C(5)-C(4)-H(4)  | 125.2    |
| Fe(1)-C(4)-H(4) | 125.2    |
| C(4)-C(5)-C(1)  | 107.4(4) |
| C(4)-C(5)-Fe(1) | 70.9(3)  |
| C(1)-C(5)-Fe(1) | 69.7(3)  |
| C(4)-C(5)-H(5)  | 126.3    |
| C(1)-C(5)-H(5)  | 126.3    |
| Fe(1)-C(5)-H(5) | 126.3    |
| N(1)-C(6)-S(1)  | 177.7(5) |
| O(1)-C(7)-Fe(1) | 179.9(5) |
| O(2)-C(8)-Fe(1) | 178.1(5) |

---

Symmetry transformations used to generate equivalent atoms:



Table 4. Anisotropic displacement parameters ( $\text{\AA}^2 \times 10^3$ ) for C790. The anisotropic displacement factor exponent takes the form:  $-2p^2 [ h^2 a^*2U^{11} + \dots + 2 h k a^* b^* U^{12} ]$

|       | U11   | U22   | U33   | U23   | U13   | U12   |
|-------|-------|-------|-------|-------|-------|-------|
| Fe(1) | 10(1) | 11(1) | 4(1)  | 1(1)  | -1(1) | 2(1)  |
| S(1)  | 23(1) | 13(1) | 8(1)  | -1(1) | -1(1) | 3(1)  |
| O(1)  | 21(2) | 33(2) | 12(2) | 5(2)  | 8(2)  | 9(2)  |
| O(2)  | 27(2) | 47(3) | 15(2) | 13(2) | 0(2)  | 20(2) |
| N(1)  | 26(3) | 24(2) | 18(2) | 5(2)  | 2(2)  | 12(2) |
| C(1)  | 16(3) | 11(2) | 11(2) | -3(2) | 0(2)  | 0(2)  |
| C(2)  | 13(2) | 15(3) | 24(3) | 7(2)  | -3(2) | -1(2) |
| C(3)  | 9(2)  | 23(3) | 9(2)  | 3(2)  | 1(2)  | -1(2) |
| C(4)  | 15(3) | 26(3) | 14(2) | -1(2) | 0(2)  | 6(2)  |
| C(5)  | 10(2) | 17(3) | 17(3) | 4(2)  | -6(2) | 2(2)  |
| C(6)  | 16(2) | 9(2)  | 16(3) | -2(2) | 0(2)  | 5(2)  |
| C(7)  | 16(3) | 14(2) | 4(2)  | -1(2) | -3(2) | 4(2)  |
| C(8)  | 19(3) | 14(2) | 21(3) | 7(2)  | 6(2)  | 9(2)  |

Table 5. Hydrogen coordinates ( $\times 10^4$ ) and isotropic displacement parameters ( $\text{\AA}^2 \times 10^3$ ) for C790.

|      | x    | y    | z    | U(eq) |
|------|------|------|------|-------|
| H(1) | 7290 | 5504 | 4377 | 19    |
| H(2) | 7692 | 6735 | 2145 | 25    |
| H(3) | 8733 | 4214 | 805  | 20    |
| H(4) | 8953 | 1459 | 2221 | 24    |
| H(5) | 8057 | 2213 | 4416 | 20    |

## CpFe(CO)<sub>2</sub>(NCS), 5

Table 1. Crystal data and structure refinement for C532.

|                                   |                                                     |                 |
|-----------------------------------|-----------------------------------------------------|-----------------|
| Identification code               | c532                                                |                 |
| Empirical formula                 | C <sub>8</sub> H <sub>5</sub> Fe N O <sub>2</sub> S |                 |
| Formula weight                    | 235.04                                              |                 |
| Temperature                       | 100(2) K                                            |                 |
| Wavelength                        | 0.71073 Å                                           |                 |
| Crystal system                    | Monoclinic                                          |                 |
| Space group                       | P2(1)/m                                             |                 |
| Unit cell dimensions              | a = 6.3240(10) Å                                    | a = 90°.        |
|                                   | b = 8.9082(14) Å                                    | b = 91.684(4)°. |
|                                   | c = 7.8468(12) Å                                    | g = 90°.        |
| Volume                            | 441.86(12) Å <sup>3</sup>                           |                 |
| Z                                 | 2                                                   |                 |
| Density (calculated)              | 1.767 Mg/m <sup>3</sup>                             |                 |
| Absorption coefficient            | 1.902 mm <sup>-1</sup>                              |                 |
| F(000)                            | 236                                                 |                 |
| Crystal size                      | 0.20 x 0.11 x 0.05 mm <sup>3</sup>                  |                 |
| Theta range for data collection   | 2.60 to 27.50°.                                     |                 |
| Index ranges                      | -7 ≤ h ≤ 8, -11 ≤ k ≤ 11, -9 ≤ l ≤ 10               |                 |
| Reflections collected             | 3137                                                |                 |
| Independent reflections           | 1075 [R(int) = 0.0322]                              |                 |
| Completeness to theta = 27.50°    | 99.1 %                                              |                 |
| Absorption correction             | Semi-empirical from equivalents                     |                 |
| Max. and min. transmission        | 0.9109 and 0.7022                                   |                 |
| Refinement method                 | Full-matrix least-squares on F <sup>2</sup>         |                 |
| Data / restraints / parameters    | 1075 / 0 / 67                                       |                 |
| Goodness-of-fit on F <sup>2</sup> | 1.236                                               |                 |
| Final R indices [I > 2σ(I)]       | R1 = 0.0310, wR2 = 0.0783                           |                 |
| R indices (all data)              | R1 = 0.0405, wR2 = 0.1073                           |                 |
| Largest diff. peak and hole       | 0.647 and -0.688 e.Å <sup>-3</sup>                  |                 |

Table 2. Atomic coordinates ( $\times 10^4$ ) and equivalent isotropic displacement parameters ( $\text{\AA}^2 \times 10^3$ ) for C532.  $U(\text{eq})$  is defined as one third of the trace of the orthogonalized  $U_{ij}$  tensor.

|       | x        | y       | z        | $U(\text{eq})$ |
|-------|----------|---------|----------|----------------|
| Fe(1) | 674(1)   | 2500    | 1677(1)  | 11(1)          |
| S(1)  | -3062(2) | 2500    | -3619(1) | 19(1)          |
| O(1)  | -1864(3) | 26(2)   | 3000(3)  | 22(1)          |
| N(1)  | -857(5)  | 2500    | -481(4)  | 16(1)          |
| C(1)  | 3507(6)  | 2500    | 301(5)   | 17(1)          |
| C(2)  | 3410(4)  | 1206(3) | 1345(4)  | 17(1)          |
| C(3)  | 3288(4)  | 1702(3) | 3076(4)  | 19(1)          |
| C(4)  | -916(4)  | 996(3)  | 2500(3)  | 16(1)          |
| C(5)  | -1746(6) | 2500    | -1793(5) | 14(1)          |

Table 3. Bond lengths [ $\text{\AA}$ ] and angles [ $^\circ$ ] for C532.

---

|                     |            |
|---------------------|------------|
| Fe(1)-C(4)          | 1.806(3)   |
| Fe(1)-C(4)#1        | 1.806(3)   |
| Fe(1)-N(1)          | 1.925(4)   |
| Fe(1)-C(3)#1        | 2.083(3)   |
| Fe(1)-C(3)          | 2.083(3)   |
| Fe(1)-C(2)#1        | 2.102(3)   |
| Fe(1)-C(2)          | 2.102(3)   |
| Fe(1)-C(1)          | 2.118(4)   |
| S(1)-C(5)           | 1.636(4)   |
| O(1)-C(4)           | 1.128(4)   |
| N(1)-C(5)           | 1.159(5)   |
| C(1)-C(2)#1         | 1.416(4)   |
| C(1)-C(2)           | 1.416(4)   |
| C(2)-C(3)           | 1.433(4)   |
| C(3)-C(3)#1         | 1.422(6)   |
|                     |            |
| C(4)-Fe(1)-C(4)#1   | 95.80(17)  |
| C(4)-Fe(1)-N(1)     | 92.50(11)  |
| C(4)#1-Fe(1)-N(1)   | 92.50(11)  |
| C(4)-Fe(1)-C(3)#1   | 120.42(12) |
| C(4)#1-Fe(1)-C(3)#1 | 89.99(12)  |
| N(1)-Fe(1)-C(3)#1   | 146.56(11) |
| C(4)-Fe(1)-C(3)     | 89.99(12)  |
| C(4)#1-Fe(1)-C(3)   | 120.42(12) |
| N(1)-Fe(1)-C(3)     | 146.56(11) |
| C(3)#1-Fe(1)-C(3)   | 39.91(16)  |
| C(4)-Fe(1)-C(2)#1   | 156.97(12) |
| C(4)#1-Fe(1)-C(2)#1 | 96.10(12)  |
| N(1)-Fe(1)-C(2)#1   | 106.59(11) |
| C(3)#1-Fe(1)-C(2)#1 | 40.05(11)  |
| C(3)-Fe(1)-C(2)#1   | 66.98(11)  |
| C(4)-Fe(1)-C(2)     | 96.10(12)  |
| C(4)#1-Fe(1)-C(2)   | 156.97(12) |
| N(1)-Fe(1)-C(2)     | 106.59(11) |

|                   |            |
|-------------------|------------|
| C(3)#1-Fe(1)-C(2) | 66.98(11)  |
| C(3)-Fe(1)-C(2)   | 40.05(11)  |
| C(2)#1-Fe(1)-C(2) | 66.53(15)  |
| C(4)-Fe(1)-C(1)   | 132.08(9)  |
| C(4)#1-Fe(1)-C(1) | 132.08(9)  |
| N(1)-Fe(1)-C(1)   | 87.88(15)  |
| C(3)#1-Fe(1)-C(1) | 66.33(13)  |
| C(3)-Fe(1)-C(1)   | 66.33(13)  |
| C(2)#1-Fe(1)-C(1) | 39.22(9)   |
| C(2)-Fe(1)-C(1)   | 39.22(9)   |
| C(5)-N(1)-Fe(1)   | 178.9(3)   |
| C(2)#1-C(1)-C(2)  | 109.0(4)   |
| C(2)#1-C(1)-Fe(1) | 69.75(18)  |
| C(2)-C(1)-Fe(1)   | 69.75(18)  |
| C(1)-C(2)-C(3)    | 107.5(3)   |
| C(1)-C(2)-Fe(1)   | 71.03(19)  |
| C(3)-C(2)-Fe(1)   | 69.27(15)  |
| C(3)#1-C(3)-C(2)  | 107.97(17) |
| C(3)#1-C(3)-Fe(1) | 70.05(8)   |
| C(2)-C(3)-Fe(1)   | 70.68(16)  |
| O(1)-C(4)-Fe(1)   | 177.9(2)   |
| N(1)-C(5)-S(1)    | 178.5(4)   |

---

Symmetry transformations used to generate equivalent atoms:

#1  $x, -y+1/2, z$

Table 4. Anisotropic displacement parameters ( $\text{\AA}^2 \times 10^3$ ) for C532. The anisotropic displacement factor exponent takes the form:  $-2p^2 [ h^2 a^* U_{11} + \dots + 2 h k a^* b^* U_{12} ]$

|       | U11   | U22   | U33   | U23   | U13   | U12   |
|-------|-------|-------|-------|-------|-------|-------|
| Fe(1) | 12(1) | 11(1) | 11(1) | 0     | 0(1)  | 0     |
| S(1)  | 26(1) | 19(1) | 13(1) | 0     | -5(1) | 0     |
| O(1)  | 23(1) | 17(1) | 26(1) | 1(1)  | 5(1)  | -5(1) |
| N(1)  | 16(2) | 16(2) | 16(2) | 0     | 0(1)  | 0     |
| C(1)  | 12(2) | 19(2) | 20(2) | 0     | 4(2)  | 0     |
| C(2)  | 10(1) | 17(1) | 24(1) | -2(1) | 1(1)  | 2(1)  |
| C(3)  | 12(1) | 24(2) | 19(1) | 4(1)  | -3(1) | 1(1)  |
| C(4)  | 16(1) | 18(1) | 14(1) | -2(1) | 0(1)  | 4(1)  |
| C(5)  | 14(2) | 10(2) | 17(2) | 0     | 3(2)  | 0     |

Table 5. Hydrogen coordinates ( $\times 10^4$ ) and isotropic displacement parameters ( $\text{\AA}^2 \times 10^3$ ) for C532.

|      | x    | y    | z    | U(eq) |
|------|------|------|------|-------|
| H(1) | 3596 | 2500 | -969 | 21    |
| H(2) | 3455 | 140  | 948  | 20    |
| H(3) | 3248 | 1042 | 4106 | 22    |
